# Supplementary material for: The strand-biased mitochondrial DNA methylome and its regulation by DNMT3A
Source: Genome Res. 2019 Oct;29(10):1622–34. doi: 10.1101/gr.234021.117 (PMC6771398; doi:10.1101/gr.234021.117)
Supplement: Supplemental Material [file supp_gr.234021.117_Supplemental_Table_S1.xlsx]

## Sheet: Table S1
Table S1. Summary of literature evidence for presence or absence of mtDNA methylation.
studies	existance of mtDNA methylation	methods	Methytransferase/demethylase existance in mitochondria	flaws
Nass, 1973	yes	radiolabeling & TLC
Dawid, 1974	no	radiolabeling & TLC		sensitivity is low
Shmookler Reis and Goldstein, 1983	yes	digestion restriction enzyme MspI & HpaII
Pollack et al., 1984	yes	digestion restriction enzyme MspI & HpaII
Maekawa et al., 2004	no	bisulfite treatment and PCR-single-strand DNA conformation polymorphism (BiPS)		(1) un-strand specific primer design and analysis (2) not considering non-CpG methylation
Shock et al., 2011	yes	(1) 5mC and 5hmC by MeDIP (2) 5hmC by glucosyltransferase assay digested with G1a1	DNMT1
Chestnut et al., 2011	yes	5mC by immunoreactivity	DNMT3A and DNMT1
Infantino et al., 2011	yes	LC-MS/MS
Chen et al., 2012	yes	5hmC by glucosyltransferase assay digested with CviAII	TET1 and TET2
Dzitoyeva et.al, 2012	yes	(1) 5mC and 5hmC by ELISA (2) 5hmC by glucosyltransferase assay digested with CviAII & CviQI	TET1 & TET2
Bellizzi et al., 2013	yes	(1) bisulfite treatment-PCR-sequencing (2) 5mC and 5hmC by MeDIP	DNMT1, DNMT3A ,TET1 and TET2
Hong et al., 2013	no	(1) bisulfite treatment-PCR-sequencing (2) public WGBS		(1) un-strand specific primer design and analysis (2) not considering non-CpG methylation
Wong et al., 2013	yes	5mC by immunoreactivity	DNMT3A
Ghosh et al., 2014	yes	5mC by MeDIP-seq
Liu et al., 2016	yes	linearization by BamHI digestion-Bisulfite treatment-PCR-pyrosequencing
Devall et al., 2017	yes	5mC by MeDIP-seq
Mechta et al., 2017	no	(1) linearization by BamHI digestion-Bisulfite treatment-PCR and pyrosequencing (2) lnearization and WMGBS		(1) un-strand specific primer design and mapping
Saini et al., 2017	yes	digestion by restriction enzyme MspI & HpaII	DNMT1 isoform 3
Shigeru Matsuda et al., 2018	no	(1) linearization and WMGBS (2) methylaqtion sensitive restriction enzyme McrBC (3) LC/MS		(1) not considering non-CpG methylation (2) ignore low methylation detected by LC/MC
Owa et al., 2018	no	(1) linearization by Mlul digestion-Bisulfite treatment-PCR-pyrosequencing (2) linearization by MluI digestion and WMGBS		(1) no strand specific analysis; (2) not considering non-CpG methylation by evaluating bisulfite conversion efficiency based on cytosine conversion rate (C versus T) at non-CpG sites determined
