# Supplementary material for: The strand-biased mitochondrial DNA methylome and its regulation by DNMT3A
Source: Genome Res. 2019 Oct;29(10):1622–34. doi: 10.1101/gr.234021.117 (PMC6771398; doi:10.1101/gr.234021.117)
Supplement: Supplemental Material [file supp_gr.234021.117_Supplemental_Table_S4.xlsx]

## Sheet: Table S4
Table S4. BS-seq read mapping and methylation levels.
			Unfiltered reads		Filtered reads*			Methylation level†
Cell type	Group ID	Total reads	No. of mapped reads	Map ratio	H strand	L strand	Fold difference (H to L)	H strand	L strand	Fold difference (H to L)
Human Brain	M_25.6	6144273	1194390	0.194	413224	5325	77.601	0.084	0.157	1.866
	W_27.2	14369032	1410732	0.098	341561	5699	59.933	0.087	0.396	4.537
	W_27.7	4440393	1503486	0.339	469630	9122	51.483	0.079	0.199	2.526
	M_34.0	6011986	2233628	0.372	719078	7159	100.444	0.096	0.163	1.702
	W_37.3	6976291	2322634	0.333	694355	11247	61.737	0.088	0.212	2.394
	W_40.7	14257270	1992008	0.14	435976	15644	27.869	0.075	0.13	1.738
	M_46.8	19043760	1105713	0.058	364372	15402	23.657	0.091	0.378	4.164
	W_50.5	4687337	1138729	0.243	367513	3387	108.507	0.06	0.219	3.628
	W_53.9	31020592	1663336	0.054	437661	7053	62.053	0.1	0.298	2.987
	W_59.2	6612737	2728690	0.413	746021	11624	64.179	0.08	0.172	2.153
	M_62.2	5356560	1294232	0.242	438341	5924	73.994	0.077	0.214	2.787
	C_76.7	28839812	809538	0.028	190015	11887	15.985	0.068	0.178	2.623
	C_87.1	18074807	1258237	0.07	269551	4987	54.051	0.062	0.27	4.341
	C_90.2	23084712	1544414	0.067	307994	8854	34.786	0.062	0.141	2.281
Human Brain (Background)	M_25.6	16661031	96652	0.006	37019	18091	2.046	0.005	0.004	0.736
	W_27.7	19600748	237786	0.012	80857	24746	3.267	0.007	0.007	0.989
	M_46.8	24492111	660648	0.027	166650	33223	5.016	0.008	0.004	0.503
	W_50.5	16348235	128362	0.008	44848	27009	1.66	0.007	0.006	0.878
Mouse Oocyte	chrM	1331910508	304887093	0.229	22010032	1447339	15.207	0.012	0.092	7.654
	Lambda	1331910508	1509557	0.001	190370	292260	0.651	0.005	0.005	1.037
A549	DNMT3AOE	68846076	2342996	0.034	573321	10935	52.43	0.074	0.239	3.21
	OECTRL	97004075	1853402	0.019	400825	8610	46.553	0.042	0.117	2.778
* Reads were filtered to remove potentially unconverted reads and duplicated reads
† Methylation levels are given as a mean for the specified strand
