# Supplementary material for: The strand-biased mitochondrial DNA methylome and its regulation by DNMT3A
Source: Genome Res. 2019 Oct;29(10):1622–34. doi: 10.1101/gr.234021.117 (PMC6771398; doi:10.1101/gr.234021.117)
Supplement: Supplemental Material [file supp_gr.234021.117_Supplemental_Table_S5.xlsx]

## Sheet: Table S5
Table S5. BS-seq reads mapping to numts and non-numts region.
	non.numtS.human.H	non.numtS.mito.H	numtS.mito.H	non.numtS.human.to.mito.H	mito.H.non.numtS.to.numtS	non.numtS.human.L	non.numtS.mito.L	numtS.mito.L	non.numtS.human.to.mito.L	mito.L.non.numtS.to.numtS	non.numtS.human.L.to.H	non.numtS.mito.L.to.H	numtS.mito.L.to.H
M_25.6	0.135098	0.122122	0.101962	1.10626	1.19772	0.235027	0.224309	0.222777	1.04778	1.00688	1.73968	1.83677	2.18491
W_27.2	0.0537292	0.0388066	0.0329574	1.38454	1.17748	0.399533	0.356278	0.268512	1.12141	1.32686	7.43604	9.18087	8.14723
W_27.7	0.130799	0.116756	0.100453	1.12027	1.1623	0.279817	0.264673	0.263152	1.05722	1.00578	2.13929	2.26689	2.61965
M_34.0	0.150056	0.134821	0.11382	1.113	1.18451	0.251215	0.237438	0.21757	1.05802	1.09132	1.67414	1.76114	1.91153
W_37.3	0.141458	0.127248	0.11145	1.11167	1.14175	0.299457	0.281476	0.229075	1.06388	1.22875	2.11693	2.21203	2.0554
W_40.7	0.0365199	0.0253584	0.0214769	1.44015	1.18073	0.0513511	0.0434935	0.0189163	1.18066	2.29925	1.40611	1.71515	0.880776
M_46.8	0.151611	0.131123	0.123467	1.15625	1.06201	0.489602	0.462026	0.436901	1.05969	1.05751	3.22933	3.52362	3.53862
W_50.5	0.10775	0.0961651	0.0853966	1.12047	1.1261	0.304218	0.291547	0.275463	1.04346	1.05839	2.82336	3.03173	3.22569
W_53.9	0.0625809	0.0514862	0.0479206	1.21549	1.07441	0.252635	0.236833	0.192965	1.06672	1.22734	4.03693	4.59993	4.02677
W_59.2	0.130612	0.118055	0.0948113	1.10637	1.24516	0.262863	0.243453	0.199437	1.07973	1.2207	2.01255	2.0622	2.10352
M_62.2	0.126435	0.114318	0.0970984	1.10599	1.17734	0.299623	0.289322	0.282197	1.0356	1.02525	2.36978	2.53085	2.9063
C_76.7	0.0298277	0.0186238	0.020403	1.60159	0.912798	0.129695	0.111762	0.0438214	1.16045	2.5504	4.34812	6.00104	2.14779
C_87.1	0.0171975	0.0119862	0.010431	1.43477	1.14909	0.228088	0.210376	0.126372	1.08419	1.66474	13.2629	17.5514	12.115
C_90.2	0.0137413	0.0117934	0.00969231	1.16517	1.21678	0.0643754	0.0614431	0.0227198	1.04772	2.70439	4.68481	5.20997	2.3441
DNMT3AOECTL	0.0556423	0.0427078	0.0370625	1.30286	1.15232	0.128164	0.119098	0.093332	1.07612	1.27607	2.30335	2.78867	2.51823
DNMT3AOE	0.089859	0.0751204	0.0618214	1.1962	1.21512	0.253777	0.242509	0.265603	1.04647	0.91305	2.82417	3.22828	4.2963
