# Supplementary material for: The strand-biased mitochondrial DNA methylome and its regulation by DNMT3A
Source: Genome Res. 2019 Oct;29(10):1622–34. doi: 10.1101/gr.234021.117 (PMC6771398; doi:10.1101/gr.234021.117)
Supplement: Supplemental Material [file supp_gr.234021.117_Supplemental_Table_S6.xlsx]

## Sheet: Table S6
Table S6. BS-seq reads mapping to ChrM and methylation level.
	All chrM mapping reads			Unique to ChrM						Both nuclear and ChrM
Group ID				Coverage			Methylation Level			Coverage			Methylation Level
	ChrM	also nuclear	Ratio nuclear/chrM	H	L	H/L	H	L	L/H	H	L	H/L	H	L	L/H
M_25.6	465828	203238	0.436	259225	3365	77.036	0.102	0.423	4.152	199734	3504	57.002	0.116	0.294	2.535
W_27.2	217065	95968	0.442	117300	3797	30.893	0.048	0.87	18.192	92061	3907	23.563	0.068	0.774	11.454
W_27.7	531250	229448	0.432	296636	5166	57.421	0.098	0.444	4.54	223631	5817	38.444	0.113	0.297	2.62
M_34.0	795213	335447	0.422	454388	5378	84.49	0.114	0.476	4.173	330508	4939	66.918	0.133	0.327	2.459
W_37.3	807793	347366	0.43	451930	8497	53.187	0.118	0.57	4.828	339746	7620	44.586	0.129	0.382	2.959
W_40.7	470739	190810	0.405	273022	6907	39.528	0.026	0.248	9.699	181584	9226	19.682	0.031	0.072	2.333
M_46.8	513272	228694	0.446	257316	27262	9.439	0.198	0.869	4.393	203783	24911	8.18	0.201	0.708	3.529
W_50.5	422070	185715	0.44	233971	2384	98.142	0.079	0.492	6.194	183433	2282	80.383	0.093	0.386	4.127
W_53.9	515737	220530	0.428	290045	5162	56.188	0.046	0.604	13.144	214926	5604	38.352	0.066	0.416	6.266
W_59.2	837302	357792	0.427	472403	7107	66.47	0.1	0.456	4.577	350342	7450	47.026	0.117	0.277	2.36
M_62.2	497624	213540	0.429	279990	4094	68.39	0.096	0.454	4.746	209896	3644	57.6	0.109	0.346	3.161
C_76.7	274216	116315	0.424	150687	7214	20.888	0.043	0.512	12.012	107395	8920	12.04	0.036	0.201	5.547
C_87.1	390277	158025	0.405	228208	4044	56.431	0.021	0.64	30.425	153944	4081	37.722	0.021	0.333	16.227
C_90.2	440437	179682	0.408	256247	4508	56.843	0.01	0.3	28.706	172768	6914	24.988	0.015	0.124	8.054
