# Supplementary material for: The strand-biased mitochondrial DNA methylome and its regulation by DNMT3A
Source: Genome Res. 2019 Oct;29(10):1622–34. doi: 10.1101/gr.234021.117 (PMC6771398; doi:10.1101/gr.234021.117)
Supplement: Supplemental Material [file supp_gr.234021.117_Supplemental_Table_S8.xlsx]

## Sheet: Table S8
Table S8. Primers.
Bisulfite conversion primers
Primer name	Within gene	Sequence 5’-3’	Methprimer ID	Reference
ESR1F	ESR1	GGTTTTTGAGTTTTTTGTTTTG	55	(Pattyn et al., 2006; Stothard, 2000)
ESR1R		AACTTACTACTATCCAAATACACCTC
BCL2F	BCL2	TCGGGTTGTGTAGAGAATGAAGTAA	47	(Pattyn et al., 2006)
BCL2R		CCTTTCTCCTCCTCCTAATCCTAC
mtDNA copy number primers
Primer name	Within gene	Sequence 5’-3’	Type	Reference
APP-F	APP	TTTTTGTGTGCTCTCCCAGGTCT	nuclear gene	(He et al., 2012)
APP-R		TGGTCACTGGTTGGTTGGC
ND4-F	ND4	TGGCTATCATCACCCGATG	mtDNA gene	(Iyer et al., 2009)
ND4-R		TGAGTAGTAGAATGTTTAGTGAGC
MT1-F		CACCCCTCACCCACTAGGATAC	mtDNA gene	(Chatterjee et al., 2016)
MT1-R		TCCATGGGGACGAGAAGGATT
MT2-F		CCACCTACCTCCCTCACCAA	mtDNA gene	(Chatterjee et al., 2016)
MT2-R		AATGATCAGTACTGCGGCGG
MT3-F		AATCATCGCTATCCCCACCG	mtDNA gene	(Chatterjee et al., 2016)
MT3-R		CAGAGCACTGCAGCAGATCA
ZBED5 (promoter)-F		GGATTGGTGGCGGGACGC	nuclear gene	(Chatterjee et al., 2016)
ZBED5 (promoter)-R		GCACTCTAGAGCACCCGAACCCT
Mitochondrial gene expression primers
Primer name	Within gene	Sequence 5’-3’	Type	Reference
ND6-F	ND6	CTCCCGAATCAACCCTGACC	mtDNA gene	(Chatterjee et al., 2016)
ND6-R		TGGTGCTGTGGGTGAAAGAG
ND2-F	ND2	TGCAGGCACACTCATCACAG	mtDNA gene	(Chatterjee et al., 2016)
ND2-R		GATGGCAGCTTCTGTGGAAC
COX2-F	COX2	CTGCGACTCCTTGACGTTGA	mtDNA gene	(Chatterjee et al., 2016)
COX2-R		AAGCCTAATGTGGGGACAGC
ATP8/6-F	ATP8/6	CCACCTACCTCCCTCACCAA	mtDNA gene	(Chatterjee et al., 2016)
ATP8/6-R		AATGATCAGTACTGCGGCGG
ATP6/COX3-F	ATP6/COX3	CCTAGAAATCGCTGTCGCCT	mtDNA gene	(Chatterjee et al., 2016)
ATP6/COX3-R		CTGTTAGGGGTCATGGGCTG
COX3-F	COX3	ACCCTCCTACAAGCCTCAGA	mtDNA gene	(Chatterjee et al., 2016)
COX3-R		TGACGTGAAGTCCGTGGAAG
ND3-F	ND3	TTCGACCCTATATCCCCCGC	mtDNA gene	(Chatterjee et al., 2016)
ND3-R		GTAGGGCTCATGGTAGGGGTA
ND4L-F	ND4L	TCGCTCACACCTCATATCCTC	mtDNA gene	(Chatterjee et al., 2016)
ND4L-R		AGGCGGCAAAGACTAGTATGG
ND4-F	ND4	TTCCCCAACCTTTTCCTCCG	mtDNA gene	(Chatterjee et al., 2016)
ND4-R		TGGATAAGTGGCGTTGGCTT
ND5-F	ND5	GCTTAGGCGCTATCACCACT	mtDNA gene	(Chatterjee et al., 2016)
ND5-R		TGCAGGAATGCTAGGTGTGG
CYTB-F	CYTB	AACTTCGGCTCACTCCTTGG	mtDNA gene	(Chatterjee et al., 2016)
CYTB-R		GATGAAAAGGCGGTTGAGGC
12srRNA-F	12s rRNA	CCCCAGGGTTGGTCAATTTCG	mtDNA gene	(Chatterjee et al., 2016)
12srRNA-R		TATTGGGGAGGGGGTGATCTAAAA
18srRNA-F	18s rRNA	CTCAACACGGGAAACCTCAC	nuclear gene	(Chatterjee et al., 2016)
18srRNA-R		CGCTCCACCAACTAAGAACG
