# Supplementary material for: The strand-biased mitochondrial DNA methylome and its regulation by DNMT3A
Source: Genome Res. 2019 Oct;29(10):1622–34. doi: 10.1101/gr.234021.117 (PMC6771398; doi:10.1101/gr.234021.117)
Supplement: Supplemental Material [file supp_gr.234021.117_Supplemental_Table_S10.xlsx]

## Sheet: Table S10
Table S10. BS-seq reads mapping to potential NUMTs in the nuclear genome.
	Chr1						Chr2						Chr3						Chr4						Chr5						Chr6						Chr7						Chr9						Chr11
	Coverage			Methyratio			Coverage			Methyratio			Coverage			Methyratio			Coverage			Methyratio			Coverage			Methyratio			Coverage			Methyratio			Coverage			Methyratio			Coverage			Methyratio			Coverage
GroupID	R	F	FC	R	F	FC	R	F	FC	R	F	FC	R	F	FC	R	F	FC	R	F	FC	R	F	FC	R	F	FC	R	F	FC	R	F	FC	R	F	FC	R	F	FC	R	F	FC	R	F	FC	R	F	FC	R
M_25.6	134918	2331	57.8551	0.106315	0.31347	2.9485	702	794	1.12945	0.210158	0.100568	2.08971	56	4531	79.4912	0.18513	0.113206	1.63534	278	7	34.75	0.122235	NA	NA	667	42308	63.3353	0.328542	0.116166	2.82822	745	11	62.0833	0.143861	0.2	1.39023	626	184	3.38378	0.179426	0.0551892	3.25111	581	1	290.5	0.0908	NA	NA	300
W_27.2	61978	2948	21.0166	0.0498664	0.792206	15.8866	354	437	1.23099	0.480197	0.411848	1.16596	82	2164	26.0723	0.805462	0.0412443	19.5291	148	5	24.6667	0.0377059	NA	NA	710	18737	26.353	0.796595	0.037994	20.9664	291	46	6.19149	0.0699167	0.726176	10.3863	289	91	3.1413	0.0409687	0.0151304	2.7077	281	2	93.6667	0.02172	NA	NA	286
W_27.7	153403	3754	40.853	0.102738	0.313533	3.05176	791	684	1.15474	0.238969	0.26746	1.11922	112	4797	42.4513	0.182713	0.101061	1.80795	270	14	18	0.0988889	NA	NA	1116	47807	42.7995	0.331164	0.117091	2.82827	815	45	17.7174	0.144389	0.135488	1.06569	683	185	3.67204	0.177278	0.089186	1.98773	569	2	189.667	0.079	NA	NA	443
M_34.0	218623	3019	72.3917	0.122067	0.360128	2.95024	1367	1307	1.04511	0.2635	0.228979	1.15076	82	6946	83.6867	0.1188	0.10921	1.08781	490	10	44.5455	0.149778	NA	NA	1202	76556	63.6376	0.393522	0.137495	2.86209	1078	27	38.5	0.161028	0.156795	1.027	916	251	3.63492	0.168907	0.041	4.11969	896	3	224	0.08756	NA	NA	411
W_37.3	229526	4995	45.942	0.112951	0.442531	3.91791	1500	1123	1.33452	0.2217	0.155919	1.42189	192	7897	40.9171	0.332453	0.112783	2.94772	303	11	25.25	0.108882	NA	NA	1539	72485	47.0682	0.38886	0.142567	2.72756	1386	56	24.3158	0.139472	0.34561	2.47798	1111	321	3.45031	0.190696	0.0694545	2.74563	849	5	141.5	0.09084	NA	NA	688
W_40.7	128073	5361	23.8853	0.0261969	0.091416	3.48957	872	746	1.16734	0.0388169	0.0177209	2.19046	271	3683	13.5404	0.0604405	0.0292053	2.0695	194	17	10.7778	0.008	NA	NA	1700	33734	19.8319	0.056668	0.0246743	2.29664	561	105	5.29245	0.0375278	0.037434	1.00251	420	194	2.15385	0.0380303	0.00769231	4.94394	440	7	55	0.02572	NA	NA	936
M_46.8	138164	17761	7.77863	0.18921	0.820593	4.33695	1048	786	1.33164	0.5595	0.561085	1.00283	596	4667	7.81742	0.553862	0.137149	4.03839	292	11	24.3333	0.523106	NA	NA	4680	42322	9.04123	0.621907	0.139088	4.47133	737	228	3.21834	0.185139	0.663167	3.582	644	184	3.48108	0.348782	0.0649545	5.36963	572	6	81.7143	0.09272	NA	NA	1940
W_50.5	124612	1510	82.4699	0.0801294	0.394982	4.92931	738	776	1.05007	0.154367	0.100795	1.53148	38	4578	117.385	NA	0.0848485	NA	195	5	32.5	0.0788235	NA	NA	558	37414	66.9302	0.500739	0.104699	4.78268	666	11	55.5	0.0849459	0.260059	3.06146	619	185	3.32796	0.0953939	0.0537083	1.77615	577	1	288.5	0.06872	NA	NA	210
W_53.9	146230	3293	44.3928	0.0552574	0.501331	9.07265	692	760	1.09668	0.325486	0.0883922	3.68229	215	4453	20.6157	0.292884	0.0520916	5.62249	325	18	17.1053	0.0719412	0.53975	7.50266	1059	44886	42.3453	0.408499	0.063801	6.4027	646	89	7.17778	0.07675	0.253348	3.30095	574	248	2.30522	0.0605152	0.0337292	1.79415	605	3	151.25	0.04248	NA	NA	725
W_59.2	242641	4808	50.4556	0.103184	0.300863	2.91579	1211	1244	1.0264	0.165956	0.151915	1.09242	132	6773	50.9248	0.156	0.0913357	1.70799	351	17	19.5	0.0802222	NA	NA	1444	73278	50.7114	0.312534	0.133266	2.34519	1079	44	23.9778	0.132111	0.10693	1.23549	890	270	3.28413	0.141606	0.0499375	2.83567	860	1	430	0.08088	NA	NA	598
M_62.2	139418	2245	62.0739	0.103044	0.358011	3.47435	884	729	1.21096	0.22303	0.101364	2.2003	78	4526	57.2911	0.184898	0.0933955	1.97973	225	9	22.5	0.0915294	NA	NA	779	48522	62.2077	0.391013	0.118025	3.31298	686	20	32.6667	0.120194	0.222621	1.85217	530	184	2.86486	0.111333	0.0485833	2.2916	593	2	197.667	0.07736	NA	NA	437
C_76.7	72676	5217	13.9279	0.0268911	0.259324	9.64352	367	420	1.1413	0.0547931	0.110603	2.01857	225	2460	10.885	0.0964244	0.0177634	5.42828	175	15	10.9375	0.00527778	NA	NA	1611	22530	13.9764	0.194727	0.0201464	9.6656	363	115	3.12931	0.0209167	0.120556	5.76361	330	170	1.92982	0.0143939	0.00372549	3.86364	336	11	28	0.01808	NA	NA	977
C_87.1	104919	2776	37.7814	0.0163808	0.41206	25.155	445	674	1.51121	0.123209	0.00575	21.4277	89	3245	36.0556	0.142061	0.0135725	10.4668	172	9	17.2	0.00747059	NA	NA	620	32378	52.1385	0.35748	0.0129948	27.5096	448	56	7.85965	0.0103611	0.166667	16.0858	366	146	2.4898	0.015697	0.00895745	1.75239	386	4	77.2	0.00856	NA	NA	336
C_90.2	114657	4432	25.8644	0.0113519	0.160431	14.1325	533	1089	2.03933	0.0349559	0.0142273	2.45696	116	4790	40.9402	0.0410424	0.0115479	3.55408	221	19	11.05	0.00905882	NA	NA	999	36364	36.364	0.136773	0.0137808	9.92494	554	64	8.52308	0.0188462	0.041093	2.18045	492	175	2.79545	0.00887273	0.00498	1.78167	388	11	32.3333	0.01376	NA	NA	628
[truncated: 35 more columns]
