# Supplementary material for: The strand-biased mitochondrial DNA methylome and its regulation by DNMT3A
Source: Genome Res. 2019 Oct;29(10):1622–34. doi: 10.1101/gr.234021.117 (PMC6771398; doi:10.1101/gr.234021.117)
Supplement: Supplemental Material [file supp_gr.234021.117_Supplemental_Table_S12.xlsx]

## Sheet: Table S12
Table S12. RNA-seq read mapping to potential NUMTs and their flanking upstream and downstream 500 bp regions.
	Chr1			Chr2			Chr3			Chr4			Chr5			Chr6			Chr7			Chr8			Chr9			Chr10			Chr11			Chr12			Chr13			Chr14			Chr15			Chr16			Chr17
Group ID	numts	flanking	ratio	numts	flanking	ratio	numts	flanking	ratio	numts	flanking	ratio	numts	flanking	ratio	numts	flanking	ratio	numts	flanking	ratio	numts	flanking	ratio	numts	flanking	ratio	numts	flanking	ratio	numts	flanking	ratio	numts	flanking	ratio	numts	flanking	ratio	numts	flanking	ratio	numts	flanking	ratio	numts	flanking	ratio	numts
M_25.6	29657.3	5.6028	5293.3	6.03899	0	Inf							2519.41	0.953333	2642.74																232.576	0.064	3634																1054.7
W_27.2	10208.7	0.38525	26499	1441.94	0.109	13228.8				831.686	0.04	20792.1	901.319	0.252366	3571.47	0.961538	0	Inf	9.29945	0.15	61.9963	4723.33	0.02	236167	0.961538	0	Inf	0.961538	0	Inf	766.553	0.329333	2327.59	3167.71	0	Inf	367.696	0	Inf	1057.82	0.703	1504.73	0.961538	0	Inf				984.549
M_34.0	32355	6.4724	4998.92	864.059	0	Inf							2607.03	0.928462	2807.9																355.725	0.634	561.081																892.348
W_40.7	7323.51	0.44075	16616	815.455	0.6036	1350.99				847.281	0.02	42364	933.764	0.337061	2770.32	0.961538	0	Inf	15.3312	0.126	121.676	3023.03	0	Inf	0.961538	0	Inf	1.88679	0	Inf	547.688	0.278667	1965.39	2428.65	0	Inf	232.919	0	Inf	1052.76	0.220667	4770.81							710.023
M_46.8	21476.6	4.484	4789.61	6.53129	0	Inf							1709.76	0.454308	3763.44																240.909	0.586	411.108																465.935
W_53.9	10552.3	0.79725	13235.9	738.08	0.313714	2352.71				1152.31	0.12	9602.58	1071.75	0.428	2504.08	49.3506	0	Inf	34.0666	0.05	681.333	4106.11	0.1	41061.1	2.23516	0	Inf				968.863	0.4	2422.16	3121.35	0.3	10404.5	125.045	0.23	543.672	1162.13	0.5055	2298.97							1096.94
M_62.2	28311.8	4.3116	6566.42	1019.84	0	Inf							1987.97	0.739	2690.08																727.465	0.664	1095.58																1069.9
C_76.7	5124.27	0.2075	24695.3	343.444	0.200286	1714.77	0.961538	0	Inf	527.629	0.02	26381.4	584.621	0.409831	1426.5	0.961538	0	Inf	19.5312	0	Inf	1964.44	0.1	19644.4	1.72414	0.07	24.6305	0.961538	0	Inf	551.176	0.223333	2467.95	1502.63	0.004	375658	5.83333	0	Inf	534.769	0.324	1650.52							515.177
C_90.2	7117.82	0.48	14828.8	493.919	0.33275	1484.35				954.334	0.05	19086.7	814.212	0.517155	1574.41	1.42857	0	Inf	41.2844	0	Inf	3631.67	0	Inf	2.65468	0	Inf	0.961538	0	Inf	545.489	0.490667	1111.73	2133.51	0	Inf	1.26996	0.189333	6.70752	619.842	0.307	2019.03				1.92308	0.88	2.18531	728.688
[truncated: 20 more columns]
