# Supplementary material for: The strand-biased mitochondrial DNA methylome and its regulation by DNMT3A
Source: Genome Res. 2019 Oct;29(10):1622–34. doi: 10.1101/gr.234021.117 (PMC6771398; doi:10.1101/gr.234021.117)
Supplement: Supplemental Material [file supp_gr.234021.117_Supplemental_Table_S13.xlsx]

## Sheet: Table S13
Table S13. Datasets we used for reanalysis.
GEO accession	Fragmentation	Refer to Main Figure	Refer to Supplementary Figure	Reference	PMID
GSE37578	DNA was fragmented using a Covaris sonication system (Covaris S2)	Figure 1A	Figure S1C	Holger Heyn et al, 2012	22595875
GSE29127	DNA was fragmented	Figure 1A	Figure S1C	Hon GC et al, 2012	22156296
GSE44075	DNA was sonicated into 100-500bp fragments with Covaris S2 (Applied Biosystems)	Figure 1B	-	LanJiang et al, 2013	23663777
GSE56697	DNA was sonicated using the microtube protocol-300 of Covaris S2 (Applied Biosystems)	Figure 1C	-	Lu Wang et al, 2014	24813617
GSE49828	DNA was first sonicated into 200–300-bp fragments using Covaris S2 system	Figure 1D	-	Hongshan Guo et al, 2014	25079557
GSE33722	DNA was fragmented by sonication to 100–600 bp with a Branson 450 Sonifier (Branson),	Figure 2A and Figure 2B	-	Wei Xie et al, 2012	22341451
GSE16368	DNA was sonicated to ~100–500 bp with a Bioruptor sonicator (Diagenode). S	Figure 2A	-	Gascard P et al, 2015	25690954
GSE48229	DNA was sonicated to 200-bp fragments with Covaris S2 (AB)	-	Figure S4C	Zhao L et al, 2014	24835587
